# Supplementary material for: Relationship between circulating FSH levels and body composition and bone health in patients with prostate cancer who undergo androgen deprivation therapy: The BLADE study
Source: eLife. 2024 Apr 24;13:e92655. doi: 10.7554/eLife.92655 (PMC11042799; doi:10.7554/eLife.92655)
Supplement: Figure 1—source data 1. [file elife-92655-fig1-data1.xls]

## Sheet: BLADE4
IDBlade	Birthdate	Sex	Studydate	PatientHeightcm	Age	LArmFatg	LArmLeang	RArmFatg	RArmLeang	LLegFatg	LLegLeang	RLegFatg	RLegLeang	TrunkFatg	TrunkLeang	HeadFatg	HeadLeang	TOTArea	TOTBMC	TOTBMD	TOTFatg	TOTLeang	TOTg	BMI	AndroidFat	GynoidFat	AndroidGynoidRatio	TrunkAppendic.Fatratio	VATmassg	VATVolumecm3	VATareacm2	LeanHt2	ALMIAppen.LeanHt2	FMI	Studydate2	PatientHeightcm2	Age2	LArmFatg2	LArmLeang2	RArmFatg2	RArmLeang2	LLegFatg2	LLegLeang2	RLegFatg2	RLegLeang2	TrunkFatg2	TrunkLeang2	HeadFatg2	HeadLeang2
3	1961-11-24	m	42949	173	55	900.4	2834.2	974.2	2792.2	2103.3	7955.7	2210.9	7640	7633.8	25206.7	990.6	3388.7	2206.02	2660.84	1.206	14813.3	49817.5	67291.6	22.4838	28	23.6	1.18644	1.23349	#NULL!	#NULL!	#NULL!	16.6452	7.09081	4.94948	2018-08-09	173	56	1001.1	2434.6	981.1	2629.4	3059	8495.4	2982.9	8027.8	8146.5	25368	1060.6	3653.7
4	1972-09-29	m	42949	168	44	852.7	2898.3	1154.3	3162.3	2276.5	8482.6	2437.5	8767.1	8628.3	28625.8	1083.3	3724.7	2129.1	2264.86	1.064	16432.6	55660.9	74358.4	26.3458	26.2	25.1	1.04382	1.28378	#NULL!	#NULL!	#NULL!	19.7211	8.25903	5.82221	2018-09-04	168	45	1042.4	2805.3	993.2	2863.5	2732.1	9063	3138.8	9228.6	8416.5	29763.1	922.6	3188.8
7	1952-04-29	m	42976	178	65	530.6	3096.3	494.5	3379.5	1411.8	9293.7	1644.6	9245.5	5250.5	26472.7	1035.6	3591.3	2189.15	2169.42	0.991	10367.6	55079	67616	21.3407	16.6	16.4	1.0122	1.28641	#NULL!	#NULL!	#NULL!	17.3839	7.89515	3.27219	2018-09-18	178	66	576.6	2951.5	548.3	2914.4	2029.7	9172.7	2131.4	9300.6	4878.3	26168.1	1035.3	3594.1
8	1953-11-17	m	42977	180	63	2384	5155.1	2643	4172.4	5542.7	12134.4	6045.2	10837.8	22304.6	39271.8	1278.4	4298.6	2474.47	3079.48	1.245	40197.8	75869.9	119147	36.7738	43	35.4	1.21469	1.34245	#NULL!	#NULL!	#NULL!	23.4166	9.96904	12.4067	2018-09-18	180	64	1714.5	4419.5	2212.5	5246.7	6081.6	11790.7	6670.5	12006.6	25676.8	42932.4	1149	3876.4
10	1947-04-17	m	43019	178	70	948	2979.9	1089.1	2844.9	2677	8766	2621.8	8665.8	10819.6	26826.2	955.6	3299.6	2321.41	2213.89	0.954	19111.2	53382.3	74707.4	23.5789	32.3	25.3	1.27668	1.47488	#NULL!	#NULL!	#NULL!	16.8483	7.34017	6.03181	2018-10-31	178	71	889.6	2572.8	987.6	2865.8	3121.7	9057.6	3236.9	9500.4	8932.6	28558	907.2	3148
11	1946-12-05	m	43020	172	70	1379.2	3181.4	1575	3336.1	2637.9	7888	2876.8	7958.3	11117.9	24248	975.6	3369.4	2333.18	2375.41	1.018	20562.3	49981.2	72918.9	24.6481	37.5	24.7	1.51822	1.31279	#NULL!	#NULL!	#NULL!	16.8947	7.55942	6.95048	2018-10-10	172	71	1237.2	3140.6	1383.5	3245.3	2833.1	7960.2	2684.1	8379.5	10930.5	27163.4	936.5	3234.9
12	1959-07-05	m	43025	170	58	524.7	2324.6	629.1	2438.6	1240.6	6366.7	1446.2	6423.2	4830.7	20358.5	974.7	3370.5	1779.81	1605.79	0.902	9646	41282	52533.8	18.1778	21.2	18.8	1.12766	1.2578	#NULL!	#NULL!	#NULL!	14.2844	6.07374	3.33772	2018-10-10	170	59	831	2457.2	974.8	2568.4	2149.1	6798.7	2205.6	6842.3	7581.7	22734.9	937.5	3236.2
13	1942-07-31	m	43112	175	75	988.1	3321.9	1021.4	3404.9	2024.2	8021	1914.6	8162.3	8856.2	27275.7	1038.2	3601.6	2245.27	2191.88	0.976	15842.8	53787.4	71822.1	23.4521	30.3	22.8	1.32895	1.48886	#NULL!	#NULL!	#NULL!	17.5632	7.48085	5.17316	2019-01-16	175	76	1112.5	3275.9	975.2	2885.8	2622.6	7920.4	2925.9	7950.2	8600	26724.1	995.1	3426.4
14	1956-05-03	m	43115	175	61	998.1	3481.2	1138.5	3607.7	1714.6	9137	2026.5	9815.7	8371.1	29947.2	1236.5	4227.4	2479.57	3072.86	1.239	15485.3	60216.3	78774.5	25.7223	27.2	16.7	1.62874	1.42421	#NULL!	#NULL!	#NULL!	19.6625	8.50338	5.05642	2019-01-16	175	62	1175.6	3210.2	920.8	3650.6	2722.5	10102.9	3173.1	10298	9029.2	31972.6	1194.3	4111.9
15	1951-08-14	m	43168	165	66	2068.4	2758.1	2179.4	2599.1	3493.4	7686.6	3677.6	7514.4	14027.7	25458.5	1182.2	3968.1	2018.43	1927.2	0.955	26628.6	49984.9	78540.7	28.8487	40.8	33.7	1.21068	1.22847	#NULL!	#NULL!	#NULL!	18.3599	7.55122	9.78094	2019-03-06	165	67	2039.8	2483.6	1646.3	2569.2	3396.6	7522.9	3693.6	7141.7	15172.1	27990.8	1072.8	3574.4
16	1938-09-11	m	43208	174	79	1738.4	2766.7	1781	2995.6	4795.4	8836.3	4814.2	8281.3	15287.9	29296.4	984.6	3375.3	2394.8	2815.34	1.176	29401.5	55551.6	87768.4	28.9894	35.1	34.8	1.00862	1.16444	#NULL!	#NULL!	#NULL!	18.3484	7.55711	9.71116	2019-04-16	174	80	1499.2	2958	1403.3	2634.6	4665.1	9020.7	4370.6	8106	12869.3	33210.8	1200.4	3872.5
17	1962-05-09	m	43213	172	55	1538.2	2565.2	1527.5	2692	3254.7	7369.6	3586	7362.8	15487.1	23797.7	1075.8	3628.5	2068.27	1872.22	0.905	26469.3	47415.8	75757.3	25.6075	45.1	33.5	1.34627	1.56334	#NULL!	#NULL!	#NULL!	16.0275	6.7569	8.94717	2019-04-16	172	56	1540.7	3187.2	1224.1	2694.8	3493.4	7753.4	4066.9	7784.7	16591.7	29346.1	941.7	3198.4
18	1930-06-16	m	43222	175	87	469.5	2791.4	601	2474.1	1670	8223.6	1176.2	7774.3	3941.8	24661.6	925.8	3189.4	2041.98	2056.09	1.007	8784.2	49114.4	59954.7	19.577	15.6	13.8	1.13043	1.00641	#NULL!	#NULL!	#NULL!	16.0374	6.94315	2.86831	2019-05-21	175	88	482.3	3251.2	528.3	2616.6	1790.4	8783.2	1694.7	9080.5	4769.4	26804.2	813.6	2815.4
19	1966-04-27	m	43236	181	52	1967.6	4863.8	1969.1	5468.2	6319.7	12301.2	6941.5	13128.3	16442.9	38106.6	1278.8	4347	2644.42	3403.98	1.287	34919.7	78215.1	116539	35.5724	35.7	33.7	1.05935	0.956099	817	883	169	23.8745	10.9159	10.6589	2019-05-21	181	53	2185.8	4120.5	2257.5	5276.4	7497.5	10635.2	7436.2	11020.8	17268.3	35921.7	1204.2	4089.9
20	1944-11-20	m	43290	168	73	1103	3014.4	1268.6	2763.2	2088	7196	2236.2	7784.1	10848.9	29972.4	1127.2	3835.2	2104.91	2383.13	1.132	18671.8	54565.3	75620.2	26.7929	32.7	26.7	1.22472	1.62025	972	1051	202	19.3329	7.35463	6.61558	2019-07-01	168	74	1078.2	3072.6	1115	3059.5	2576.4	7390.3	2451.8	7891.8	11504.4	27956.4	999.6	3395.1
21	1938-10-05	m	43299	170	79	1530	2922	1650.3	3216.3	2673.2	8042.7	3222.3	7804.1	12460.5	28694.8	1085.3	3703.5	2140.3	2349.5	1.098	22621.6	54383.4	79354.5	27.4583	38.5	27.2	1.41544	1.37294	1025	1108	213	18.8178	7.6073	7.82754	2019-07-04	170	80	1693	2981.7	1546.8	2890.8	3347.1	7532	3620.9	7774.4	15023.6	29069.2	1019.5	3484.5
22	1944-02-08	m	43308	187	74	1335	3171.2	1760	3026.4	4249.2	9415.4	3825.6	8875	17944.6	32870	1028.1	3520.2	2648.32	3310.34	1.25	30142.5	60878.2	94331	26.9756	37.9	31	1.22258	1.60653	711	769	147	17.4092	7.00277	8.61978	2019-04-07	187	74	1912.1	2585.3	1828.6	2890.5	5330.2	8651.9	5080.3	8151.6	18826.6	30958.6	910.9	3136.7
23	1950-09-22	m	43311	172	67	1329.1	3637	1731.5	3470.6	2935.6	9478.4	3375.5	10550.8	10890.3	29472.8	1167.1	3969.4	2211.88	2356.3	1.065	21429	60578.9	84364.2	28.5168	32.7	28.3	1.15548	1.16204	945	1022	196	20.4769	9.1728	7.24344	2019-07-01	172	68	1780.1	3038.1	1701.8	2755.7	3770.6	8905.6	4908.6	12194	15467.8	31455.4	1187.6	3941
24	1946-04-29	m	43367	172	72	951.6	3779	1096.2	4202.1	2014.5	10273.1	2231.3	10346.9	8754.4	28773.3	976.3	3379.3	2314.38	2757.72	1.192	16024.4	60753.7	79535.8	26.8847	24.8	20.5	1.20976	1.391	697	753	145	20.536	9.66776	5.41658	2019-09-25	172	73	1439.2	3218.1	1473	4567.3	2806.7	9822.1	3387	9520.5	12865.7	28510.1	1019.9	3520.6
25	1937-08-08	m	43374	165	81	1069	3052.4	953	3111.1	2014.6	7828.9	1964	8309.2	11446.1	27393.7	1356.8	4336.1	2090.27	2638.45	1.262	18803.5	54031.3	75473.2	27.722	35.4	25.6	1.38281	1.90749	1142	1235	237	19.8462	8.19159	6.9067	2019-09-25	165	82	1131.9	2713.2	956.2	2835.9	2191.5	7142.5	2601.6	7843.6	12479.4	25880.9	1096.2	3553.7
26	1947-01-26	m	43378	178	71	1020.8	3066.2	1152.1	3598.1	3102.8	9128.5	3027.3	9550.7	8615.8	32306.9	1187.8	4121.3	2550.7	3437.86	1.348	18106.7	61771.7	83316.3	26.296	24.9	23.1	1.07792	1.03767	628	679	130	19.4962	7.99883	5.71478	2019-09-25	178	72	1427.8	2988.3	1254	3241	4190.3	8573.8	3948	9033.8	11983.6	30382.1	1189.5	4114.2
27	1946-07-15	m	43383	166	72	1376.6	3698.9	1331.5	3528.7	2813.1	8762.9	3008.3	9471.5	13958.4	29027.4	1088.5	3669.5	2285.5	2460.52	1.077	23576.4	58158.9	84195.8	30.5544	38.9	25.7	1.51362	1.63649	1041	1125	216	21.1057	9.24009	8.55581	2019-09-27	166	73	1609.4	3201.3	1510.5	3197.5	2864	8504.8	3609	8849.8	14200.4	28027	1070.4	3622.6
28	1957-10-10	m	43395	175	61	1458.8	3780.1	1497.7	4146.1	2793.7	10641.3	3298.8	10036.5	20888.2	37673.9	1239	4046.6	2297.71	2950.1	1.284	31176.3	70324.5	104451	34.1064	40.5	25.5	1.58824	2.30834	1683	1820	349	22.9631	9.34008	10.18	2019-10-17	175	62	2088.2	3489.1	2171.5	3690.4	3642.8	9639.9	3615.9	9852.4	25774.3	36327	1330.8	4134.7
29	1951-06-23	m	43404	168	67	999.6	2748.9	1077.8	3095.1	2381.6	8300.9	2472.4	8361.6	10650.1	29178.9	1050.9	3613.7	2137.85	2400.6	1.123	18632.5	55299.2	76332.3	27.0452	31.6	24.2	1.30579	1.5365	887	958	184	19.593	7.97424	6.60165	2019-10-21	168	68	1520	2752.7	1531.5	2671.5	3980.9	9416.9	4064.4	9510.8	12440.2	26925	1072.6	3660.1
30	1933-07-22	m	43418	165	85	922.1	2880.5	1037.9	3091.5	2817.5	7901.8	2925.1	8349.7	7439.2	26173.3	895.4	3099.8	2176.5	2427.24	1.115	16037.1	51496.7	69961	25.6974	28.1	25.7	1.09339	0.965804	570	616	118	18.9152	8.1629	5.89058	2019-10-28	165	86	979.1	2519.6	1137.8	3044.4	2846.4	7572.6	3098.4	8055.2	8801.4	24635	875.7	3022
31	1957-12-23	m	43425	183	60	2286	3445.9	2343.7	3649	4572.3	11030.2	4855.9	10833.1	16854.9	37241.7	1240.2	4103.4	2639.78	3830.06	1.451	32153	70303.4	106286	31.7377	31.6	25.5	1.23922	1.19896	815	881	169	20.993	8.64708	9.60106	2019-11-21	183	61	2614.2	3308.2	2617.6	3469.9	5561.7	12081.9	5076.6	10947.7	18069	37154.5	1251.3	4107
32	1953-08-06	m	43451	176	65	1142	3451.2	937.1	3828.5	2458.9	8348.8	2924.3	8689.5	11730.5	29992.3	995.3	3365.7	2283.47	2733.35	1.197	20188	57676.1	80597.4	26.0193	35.7	27.4	1.30292	1.57197	805	870	167	18.6196	7.85059	6.5173	2019-11-25	176	66	1229.2	3568.8	1272.6	3510.7	3025.2	8420.5	2980.1	8685.9	13552	28947.7	955.1	3247.5
33	1938-04-02	m	43451	175	80	808.2	3166.7	782.6	3971.2	1532.4	7925.5	2023.3	8167.6	7022.8	28619	886.3	3083.6	2312.35	2919.59	1.263	13055.7	54933.5	70908.8	23.1539	25.6	20	1.28	1.36458	504	545	105	17.9375	7.58563	4.26309	2019-12-02	175	81	1179.8	3149.6	984	2841.1	2284.7	7787.2	2305.7	7801.5	12133.3	28655	919.7	3108.6
#NULL!	#NULL!		#NULL!	#NULL!	#NULL!	#NULL!	#NULL!	#NULL!	#NULL!	#NULL!	#NULL!	#NULL!	#NULL!	#NULL!	#NULL!	#NULL!	#NULL!	#NULL!	#NULL!	#NULL!	#NULL!	#NULL!	#NULL!	#NULL!	#NULL!	#NULL!	#NULL!	#NULL!	#NULL!	#NULL!	#NULL!	#NULL!	#NULL!	#NULL!	#NULL!	#NULL!	#NULL!	#NULL!	#NULL!	#NULL!	#NULL!	#NULL!	#NULL!	#NULL!	#NULL!	#NULL!	#NULL!	#NULL!	#NULL!
[truncated: 106 more columns]
